# Supplementary material for: A Novel Murine Multi-Hit Model of Perinatal Acute Diffuse White Matter Injury Recapitulates Major Features of Human Disease
Source: MDPI journal article supplement (doi:10.3390/biomedicines10112810), 2022-11-04
Supplement: s1 [file s1]

A

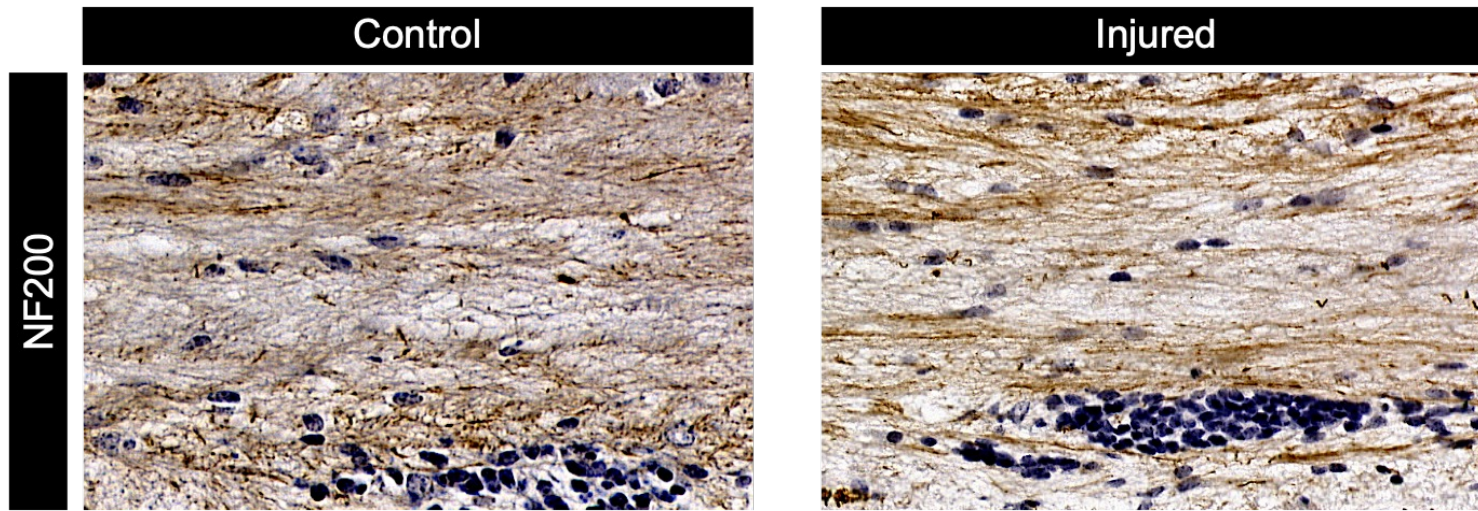

B

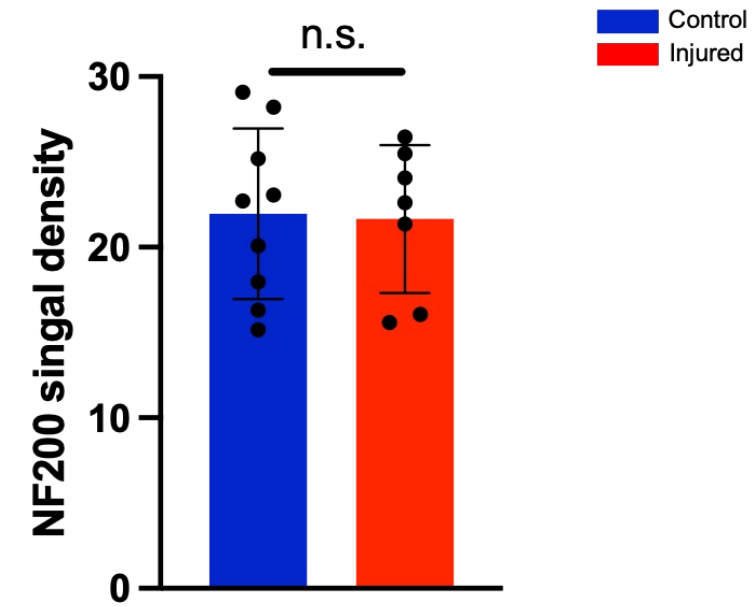

**Supplementary Figure S1: Evaluation of neurofilament density.** (A) Representative images of NF200 staining of a control and injured brain at 9dpi. (B) Quantification of NF200 signal density in the corpus callosum ( $U = 30$ ,  $p = 0.9182$ ). Data are presented as mean  $\pm$  SEM. n.s. not significant.
