# Supplementary material for: A Novel Murine Multi-Hit Model of Perinatal Acute Diffuse White Matter Injury Recapitulates Major Features of Human Disease
Source: MDPI journal article supplement (doi:10.3390/biomedicines10112810), 2022-11-04
Supplement: s1 [file s1]

Supplementary Table S1: Summary of experimental cohorts

| Mouse Nr | Experiment | Age at euthanization | Treatment    |                 | Notes                                                                                                 | Corpus callosum |              |                 |     |      |      |     | Cortex |      |     |       | Internal capsule/ Globus pallidus |      |     |
|----------|------------|----------------------|--------------|-----------------|-------------------------------------------------------------------------------------------------------|-----------------|--------------|-----------------|-----|------|------|-----|--------|------|-----|-------|-----------------------------------|------|-----|
|          |            |                      |              |                 |                                                                                                       | Olig2+ Ki67+    | Olig2+ TUNEL | Olig2+ CNPase + | Ng2 | GFAP | Iba1 | MBP | GFAP   | Iba1 | MBP | TUNEL | GFAP                              | Iba1 | MBP |
| M83      | 16         | P11                  | 2 mg/kg NaCl | Normoxia 25 MIN |                                                                                                       | x               | x            | x               |     | x    | x    | x   | x      | x    | x   | x     | x                                 | x    | x   |
| M84      | 16         | P11                  | 2 mg/kg NaCl | Normoxia 25 MIN |                                                                                                       | x               | x            | x               |     | x    | x    | x   | x      | x    | x   | x     | x                                 | x    | x   |
| M85      | 16         | P11                  | 2 mg/kg NaCl | Normoxia 25 MIN |                                                                                                       | x               | x            | x               |     | x    | x    | x   | x      | x    | x   | x     | x                                 | x    | x   |
| M86      | 16         | P11                  | 2 mg/kg LPS  | 25 MIN @ 8% O2  |                                                                                                       | x               | x            | x               |     | x    | x    | x   | x      | x    | x   | x     | x                                 | x    | x   |
| M87      | 16         | P11                  | 2 mg/kg LPS  | 25 MIN @ 8% O2  |                                                                                                       | x               | x            | x               |     | x    | x    | x   | x      | x    | x   | x     | x                                 | x    | x   |
| M88      | 16         | P11                  | 2 mg/kg LPS  | 25 MIN @ 8% O2  |                                                                                                       | x               | x            | x               |     | x    | x    | x   | x      | x    | x   | x     | x                                 | x    | x   |
| M99      | 16         | P11                  | 2 mg/kg NaCl | Normoxia 25 MIN |                                                                                                       | x               | x            | x               |     | x    | x    | x   | x      | x    | x   | x     | x                                 | x    | x   |
| M100     | 16         | P11                  | 2 mg/kg NaCl | Normoxia 25 MIN |                                                                                                       | x               | x            | x               |     | x    | x    | x   | x      | x    | x   | x     | x                                 | x    | x   |
| M101     | 16         | P11                  | 2 mg/kg NaCl | Normoxia 25 MIN |                                                                                                       | x               | x            | x               |     | x    | x    | x   | x      | x    | x   | x     | x                                 | x    | x   |
| M115     | 20         | P11                  | 2 mg/kg NaCl | Normoxia 25 MIN | Tissue not analyzed; tissue integrity compromised                                                     |                 |              |                 |     |      |      |     |        |      |     |       |                                   |      |     |
| M116     | 20         | P11                  | 2 mg/kg NaCl | Normoxia 25 MIN | Tissue not analyzed for MBP; Scanning failure                                                         | x               | x            | x               |     | x    | x    |     | x      | x    |     | x     | x                                 | x    |     |
| M117     | 20         | P11                  | 2 mg/kg LPS  | 25 MIN @ 8% O2  | Tissue not analyzed for MBP & TUNEL; Scanning failure                                                 | x               |              | x               |     | x    | x    |     | x      | x    |     | x     | x                                 | x    |     |
| M118     | 20         | P11                  | 2 mg/kg LPS  | 25 MIN @ 8% O2  | Tissue not analyzed for MBP; Scanning failure                                                         | x               | x            | x               |     | x    | x    |     | x      | x    |     | x     | x                                 | x    |     |
| M119     | 21         | P11                  | 2 mg/kg NaCl | Normoxia 25 MIN |                                                                                                       | x               | x            | x               |     | x    | x    | x   | x      | x    | x   | x     | x                                 | x    | x   |
| M120     | 21         | P11                  | 2 mg/kg NaCl | Normoxia 25 MIN | Tissue not analyzed; plane inappropriate                                                              |                 |              |                 |     |      |      |     |        |      |     |       |                                   |      |     |
| M121     | 21         | P11                  | 2 mg/kg LPS  | 25 MIN @ 8% O2  | Tissue not analyzed for MBP; plane inappropriate                                                      | x               | x            | x               |     | x    | x    | x   | x      | x    | x   | x     | x                                 | x    |     |
| M122     | 21         | P11                  | 2 mg/kg LPS  | 25 MIN @ 8% O2  |                                                                                                       | x               | x            | x               |     | x    | x    | x   | x      | x    | x   | x     | x                                 | x    | x   |
| M123     | 21         | P11                  | 2 mg/kg LPS  | 25 MIN @ 8% O2  |                                                                                                       | x               | x            | x               | x   | x    | x    | x   | x      | x    | x   | x     | x                                 | x    | x   |
| M135     | 23         | P3                   | 2 mg/kg NaCl | Normoxia 25 MIN |                                                                                                       | x               | x            | x               | x   | x    | x    |     | x      | x    |     | x     | x                                 | x    |     |
| M136     | 23         | P3                   | 2 mg/kg NaCl | Normoxia 25 MIN |                                                                                                       | x               | x            | x               | x   | x    | x    |     | x      | x    |     | x     | x                                 | x    |     |
| M137     | 23         | P3                   | 2 mg/kg LPS  | 25 MIN @ 8% O2  | Corpus callosum not analyzed for Iba1/GFAP due to inappropriate plane/ compromised anatomy            | x               | x            | x               | x   |      |      |     |        |      |     | x     | x                                 | x    |     |
| M138     | 23         | P3                   | 2 mg/kg LPS  | 25 MIN @ 8% O2  |                                                                                                       | x               | x            | x               | x   | x    | x    |     | x      | x    |     | x     | x                                 | x    |     |
| M139     | 23         | P3                   | 2 mg/kg LPS  | 25 MIN @ 8% O2  |                                                                                                       | x               | x            | x               | x   | x    | x    |     | x      | x    |     | x     | x                                 | x    |     |
| M140     | 23         | P4                   | 2 mg/kg NaCl | Normoxia 25 MIN |                                                                                                       | x               | x            | x               | x   | x    | x    |     | x      | x    |     | x     |                                   | x    |     |
| M141     | 23         | P4                   | 2 mg/kg NaCl | Normoxia 25 MIN |                                                                                                       | x               | x            | x               | x   | x    | x    |     | x      | x    |     | x     |                                   | x    |     |
| M142     | 23         | P4                   | 2 mg/kg LPS  | 25 MIN @ 8% O2  |                                                                                                       | x               | x            | x               | x   | x    | x    |     | x      | x    |     | x     |                                   | x    |     |
| M143     | 23         | P4                   | 2 mg/kg LPS  | 25 MIN @ 8% O2  |                                                                                                       | x               | x            | x               | x   | x    | x    |     | x      | x    |     | x     |                                   | x    |     |
| M144     | 23         | P11                  | 2 mg/kg NaCl | Normoxia 25 MIN |                                                                                                       | x               | x            | x               | x   | x    | x    | x   | x      | x    | x   | x     | x                                 | x    | x   |
| M145     | 23         | P11                  | 2 mg/kg LPS  | 25 MIN @ 8% O2  |                                                                                                       | x               | x            | x               |     | x    | x    | x   | x      | x    | x   | x     | x                                 | x    | x   |
| M146     | 24         | P3                   | 2 mg/kg NaCl | Normoxia 25 MIN |                                                                                                       | x               | x            | x               | x   | x    | x    |     | x      | x    |     | x     | x                                 | x    |     |
| M154     | 24         | P4                   | 2 mg/kg NaCl | Normoxia 25 MIN |                                                                                                       | x               | x            | x               | x   | x    | x    |     | x      | x    |     | x     | x                                 | x    |     |
| M155     | 24         | P4                   | 2 mg/kg NaCl | Normoxia 25 MIN | Corpus callosum not analyzed for Iba1/GFAP due to inappropriate plane/ compromised anatomy            | x               | x            | x               | x   |      |      |     | x      | x    |     | x     |                                   | x    |     |
| M156     | 24         | P4                   | 2 mg/kg NaCl | Normoxia 25 MIN |                                                                                                       | x               | x            | x               | x   | x    | x    |     | x      | x    |     | x     | x                                 | x    |     |
| M157     | 24         | P4                   | 2 mg/kg LPS  | 25 MIN @ 8% O2  | Corpus callosum not analyzed for Iba1/GFAP due to inappropriate plane/ compromised anatomy            | x               | x            | x               | x   |      |      |     | x      | x    |     | x     |                                   |      |     |
| M158     | 24         | P11                  | 2 mg/kg NaCl | Normoxia 25 MIN |                                                                                                       | x               | x            | x               |     | x    | x    | x   | x      | x    | x   | x     | x                                 | x    | x   |
| M159     | 24         | P11                  | 2 mg/kg NaCl | Normoxia 25 MIN |                                                                                                       | x               | x            | x               |     | x    | x    | x   | x      | x    | x   | x     | x                                 | x    | x   |
| M160     | 25         | P3                   | 2 mg/kg NaCl | Normoxia 25 MIN |                                                                                                       | x               | x            | x               | x   |      | x    |     | x      | x    |     | x     | x                                 | x    |     |
| M161     | 25         | P3                   | 2 mg/kg LPS  | 25 MIN @ 8% O2  | Corpus callosum and cortex not analyzed for Iba1/GFAP due to inappropriate plane/ compromised anatomy | x               | x            | x               | x   |      |      |     | x      | x    |     | x     | x                                 | x    |     |
| M162     | 25         | P3                   | 2 mg/kg NaCl | Normoxia 25 MIN |                                                                                                       | x               | x            | x               | x   | x    | x    |     | x      | x    |     | x     | x                                 | x    |     |
| M163     | 25         | P3                   | 2 mg/kg LPS  | 25 MIN @ 8% O2  | Tissue not analyzed; tissue integrity compromised                                                     |                 |              |                 |     |      |      |     |        |      |     |       |                                   |      |     |
| M165     | 25         | P3                   | 2 mg/kg LPS  | 25 MIN @ 8% O2  |                                                                                                       | x               | x            | x               | x   | x    | x    |     | x      | x    |     | x     | x                                 | x    |     |
| M166     | 25         | P3                   | 2 mg/kg LPS  | 25 MIN @ 8% O2  |                                                                                                       | x               | x            | x               | x   | x    | x    |     | x      | x    |     | x     | x                                 | x    |     |
| M167     | 25         | P4                   | 2 mg/kg NaCl | Normoxia 25 MIN |                                                                                                       | x               | x            | x               | x   | x    | x    |     | x      | x    |     | x     | x                                 | x    |     |
| M168     | 25         | P4                   | 2 mg/kg LPS  | 25 MIN @ 8% O2  |                                                                                                       | x               | x            | x               | x   | x    | x    |     | x      | x    |     | x     | x                                 | x    |     |
| M169     | 25         | P4                   | 2 mg/kg LPS  | 25 MIN @ 8% O2  |                                                                                                       | x               | x            | x               | x   | x    | x    |     | x      | x    |     | x     | x                                 | x    |     |
| M170     | 25         | P4                   | 2 mg/kg LPS  | 25 MIN @ 8% O2  |                                                                                                       | x               | x            | x               | x   | x    | x    |     | x      | x    |     | x     | x                                 | x    |     |
| M171     | 25         | P4                   | 2 mg/kg LPS  | 25 MIN @ 8% O2  |                                                                                                       | x               | x            | x               | x   | x    | x    |     | x      | x    |     | x     | x                                 | x    |     |
